# Supplementary material
Source: publisher figshare collection journal article supplement (https://acs.figshare.com/ndownloader/files/15684263)
Supplement: Supplementary file 1 [file 15684263]

# Supporting Information

**A novel porous N, S-self-doped carbon derived from Chinese rice wine lees as  
high-performance electrode materials in supercapacitor**

Dongling Wu, Jinyan Cheng, Tao Wang\*, Penggao Liu, Liu Yang and Dianzeng Jia\*

*Key Laboratory of Energy Materials Chemistry, Ministry of Education, Key  
Laboratory of Advanced Functional Materials, Autonomous Region, Institute of  
Applied Chemistry, Xinjiang University, Xinjiang 830046, P. R. China*

Number of Pages: 3

Number of Figures: 4

Number of Tables: 1

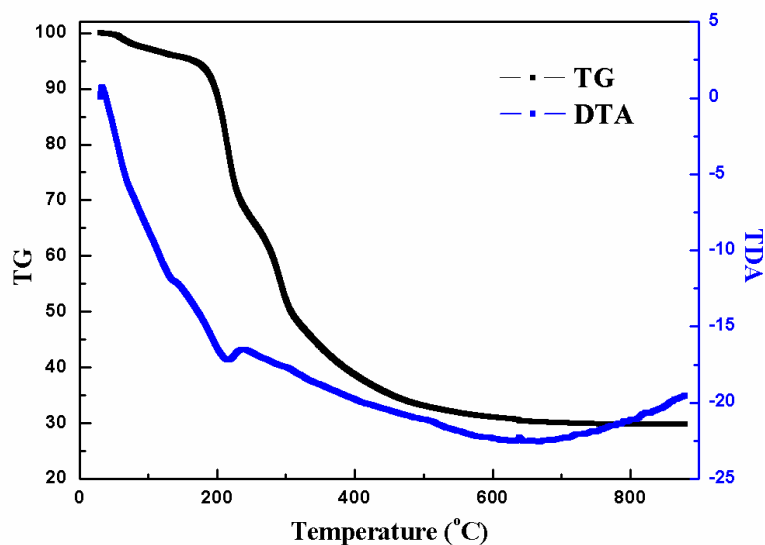

Fig. S1 TGA and DTA of the precursor composites

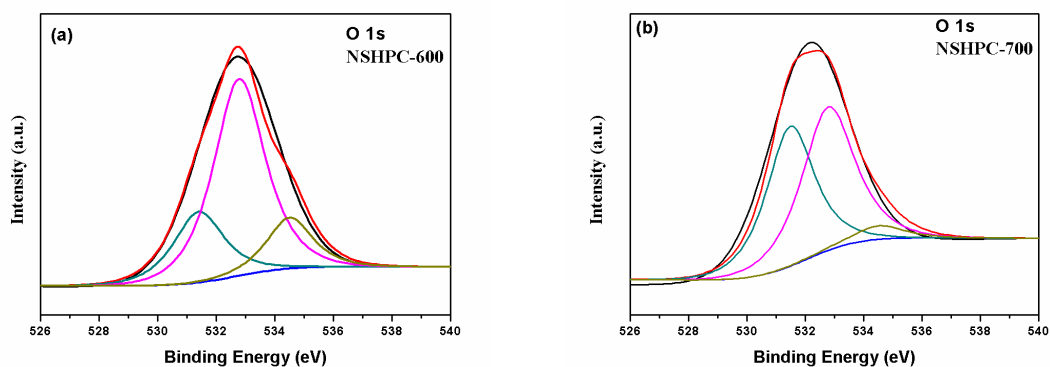

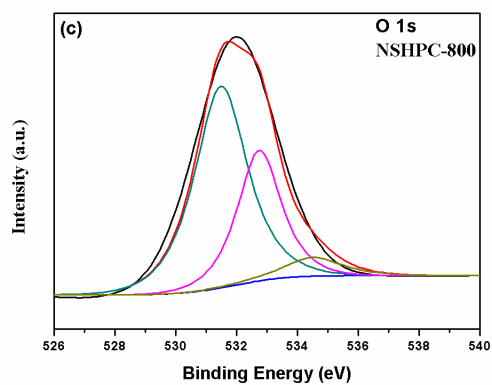

Fig. S2 O 1s Region of NSHPC-600, NSHPC-700, NSHPC-800, respectively.

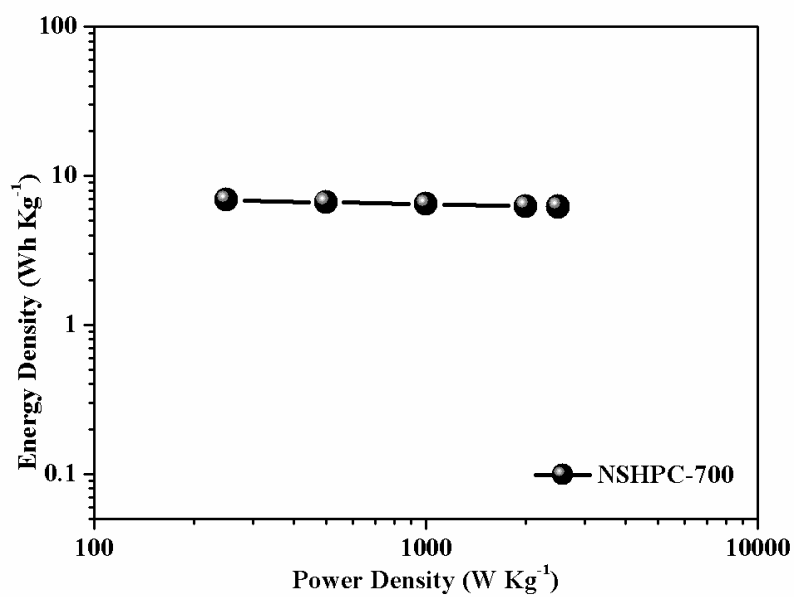

Fig. S3 Ragone plot of energy density versus power density tested in 6 M KOH

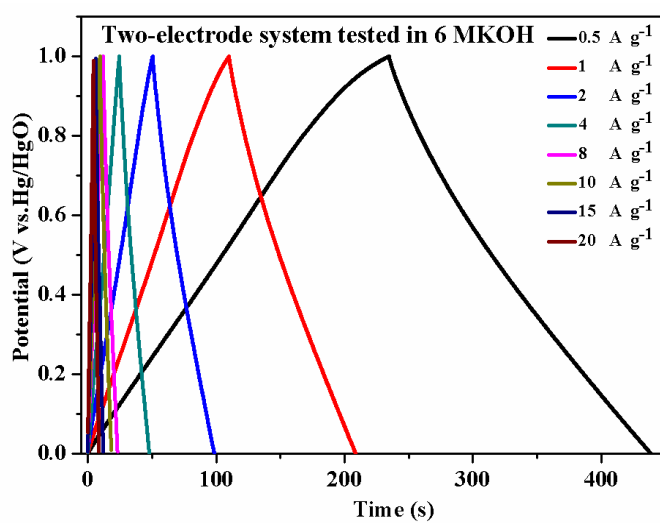

Fig. S4 The GCD curves of NSHPC-700 electrode measured in a two-electrode system in 6 M KOH aqueous electrolyte.

Table S1 The specific capacitance of NSHPC-700 electrode at different current density measured in a two-electrode system in 6 M KOH aqueous electrolyte.

| <b>Current density</b><br>(A g <sup>-1</sup> )      | 0.5 | 1   | 2   | 4   | 8   | 10  |
|-----------------------------------------------------|-----|-----|-----|-----|-----|-----|
| <b>Specific capacitance</b><br>(F g <sup>-1</sup> ) | 204 | 200 | 196 | 189 | 188 | 188 |
